# Supplementary material for: Affinity proteomics within rare diseases: a BIO-NMD study for blood biomarkers of muscular dystrophies
Source: PubMed Central journal article supplement (PMC4119355; doi:10.15252/emmm.201303724), 2014-06-11
Supplement: emmm0006-0918-SD4.pdf [file emmm0006-0918-SD4.pdf]

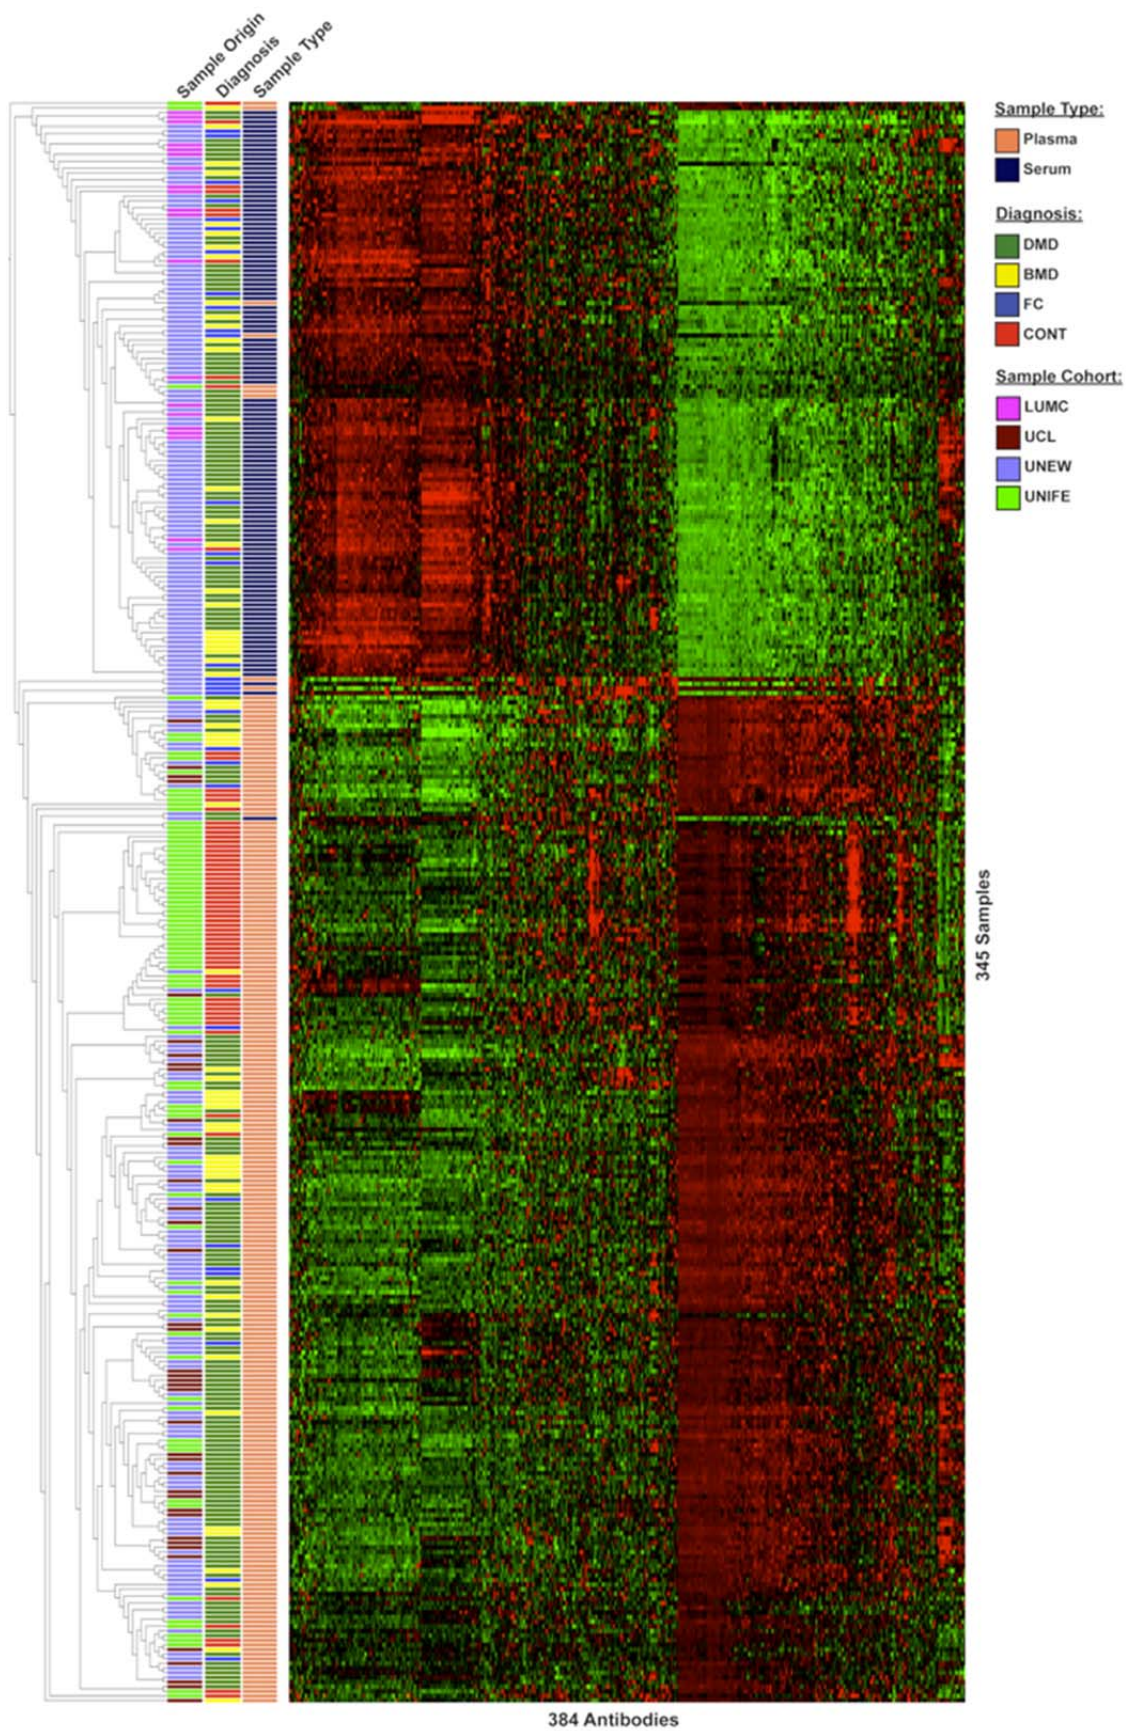

**Supplementary Figure S4. Effect of blood preparation type and sample origin on protein profiles.** Hierarchical clustering of all 345 samples and 384 antibodies included in the study, where samples are color-annotated according to blood preparation type, diagnosis and sample origin in the dendrogram.
