# Supplementary material for: Affinity proteomics within rare diseases: a BIO-NMD study for blood biomarkers of muscular dystrophies
Source: PubMed Central journal article supplement (PMC4119355; doi:10.15252/emmm.201303724), 2014-06-11
Supplement: emmm0006-0918-SD13.pdf [file emmm0006-0918-SD13.pdf]

**Supplementary Table S1. Number and percentage of antibodies revealing signal intensities at noise level.** Beads prepared with a protein-free solution and with normal rabbit IgG (without a defined specificity) were used to assess the non-specific background binding. The spread of non-specific binding across all samples was then used to determine the “noise” threshold in serum and plasma (*Supplementary Figure S2*). The number and percentage of antibodies revealing signal intensities below this threshold are summarized in the table. A total of 69 antibodies, namely 18% of the antibodies in the entire set revealed signal intensities at noise level.

|                                    | Nr of Antibodies |       | % of Antibodies |       |
|------------------------------------|------------------|-------|-----------------|-------|
|                                    | Plasma           | Serum | Plasma          | Serum |
| Below threshold for empty bead     | 16               | 23    | 4               | 6     |
| Below threshold for rabbitIgG bead | 66               | 53    | 17              | 14    |
